# Supplementary material for: Evaluating the Effectiveness of High-Fidelity Simulation-Based Training on Clinical Skill Transfer in Obstetric Ultrasound Residents: A Prospective Randomized Controlled Trial
Source: Research Square preprint supplement (doi:10.21203/rs.3.rs-7132399/v1), 2025-08-21
Supplement: Supplementary file 1 [file 4df17e207b43afe9ce2244ab.docx]

**Advances in Health Sciences Education**

**Original Article**

**Evaluating the Efficacy of High-Fidelity Simulators on Skill Transfer and Competency Assessment in Obstetric Ultrasound Residents: A Prospective Randomized Controlled Trial**

Jinguang Zhou1, Yongfeng Zhao1, Ping Zhou1, Xiaohong Tang2, Jie Wang1, Wengang Liu1, Shiyan Guo1**,** Linlu Li**3**

1Department of Ultrasound, The Third Xiangya Hospital of Central South University, Changsha, China; 2Clinical skill center, The Third Xiangya Hospital of Central South University, Changsha, China; **3Dep**artment of Ultrasound, The First Affiliated Hospital of Hunan University of Chinese Medicine, Changsha, China

Corresponding author: Yongfeng Zhao, E-mail: redscv@qq.com,

[Tel: 008615084891696](Tel:008673188618403), Department of Ultrasound, The Third Xiangya Hospital of Central South University, Changsha, China, ORCID: 0000-0002-0777-1890

| **Supplementary Material. Simulation-based obstetric ultrasound training curriculum** | | | |
| --- | --- | --- | --- |
| Modules | Sections |  | Training contents |
| Task module 1 | Preparations | 1.1 | Check the name of the pregnant woman |
| 1.2 | Check the age of the pregnant woman |
| 1.3 | Check the last menstruation date and the week of gestation |
| 1.4 | Check the history of pregnant and birth, genetic diseases, and surgery |
| 1.5 | Inform the pregnant women about the aims, contents, and limitations of obstetric ultrasound examination |
| General information | 1.6 | Check the fetal number |
| 1.7 | Check the fetal presentation |
| 1.8 | Measure fetal heart rate |
| 1.9 | Check fetal movement |
| Head | 1.10 | Check the skull bone |
| 1.11 | Obtain the transventricular plane |
| 1.12 | Check the midline falx on the transventricular plane |
| 1.13 | Check the lateral ventricles on the transventricular plane |
| 1.14 | Check the choroid plexus on the transventricular plane |
| 1.15 | Measure the width of the lateral ventricle |
| 1.16 | Obtain the transthalamic plane |
| 1.17 | Measure biparietal diameter (BPD) |
| 1.18 | Measure head circumference (HC) |
| 1.19 | Check the cavum septi pellucidi on the transthalamic plane |
| 1.20 | Check the thalami on the transthalamic plane |
| 1.21 | Check the third ventricle on the transthalamic plane |
| 1.22 | Check the insula on the transthalamic plane |
| 1.23 | Obtain the transcerebellar plane |
| 1.24 | Check the cerebellar hemispheres |
| 1.25 | Check the cerebellar vermis |
| 1.26 | Measure the transverse cerebellar diameter |
| 1.27 | Check the cisterna magna |
| 1.28 | Measure the width of cisterna magna |
| Face | 1.29 | Obtain the axial view of the orbits |
| 1.30 | Check the orbits |
| 1.31 | Check the lenses |
| 1.32 | Obtain the midline facial profile |
| 1.33 | Check the nasal bone |
| 1.34 | Obtain the coronal plane of the face |
| 1.35 | Check the nose |
| 1.36 | Check the lips |
| Task module 2 | Heart | 2.1 | Obtain the four-chamber view of the heart |
| 2.2 | Check the location of the heart |
| 2.3 | Check the orientation of the cardiac apex |
| 2.4 | Check the cardiac axis |
| 2.5 | Check the heart/chest ratio |
| 2.6 | Check the inferior vena cava (IVC) and the connection of IVC to right atrium |
| 2.7 | Check the right atrium |
| 2.8 | Check the left atrium |
| 2.9 | Check the pulmonary veins and the connection of pulmonary veins to left atrium |
| 2.10 | Check the interatrial septum |
| 2.11 | Check the foramen ovale |
| 2.12 | Check the left ventricle |
| 2.13 | Check the right ventricle |
| 2.14 | Check the interventricular septum |
| 2.15 | Check the mitral valve |
| 2.16 | Check the tricuspid valve |
| 2.17 | Evaluate blood flow signals in the four-chamber view by CDFI |
| 2.18 | Obtain the left ventricular outflow tract plane of the heart |
| 2.19 | Check the left ventricular outflow tract |
| 2.20 | Check the ascending aorta |
| 2.21 | Evaluate blood flow signals in the LV outflow tract by CDFI |
| 2.22 | Obtain the right ventricular outflow tract plane of the heart |
| 2.23 | Check the right ventricular outflow tract |
| 2.24 | Check the pulmonary artery |
| 2.25 | Evaluate blood flow signals in the right ventricular outflow tract by CDFI |
| 2.26 | Obtain the three-vessel view of the heart |
| 2.27 | Obtain the three-vessel and trachea view of the heart |
| 2.28 | Check the ductal arch |
| 2.29 | Check the aortic arch |
| 2.30 | Check the superior vena cava |
| 2.31 | Check the trachea |
| 2.32 | Evaluate blood flow signals in the three-vessel and trachea view by CDFI |
| Task module 3 | Neck | 3.1 | Check the presence of masses in the neck |
| 3.2 | Check the presence of skin edema in the neck |
| 3.3 | Check the presence of umbilical cord around the neck |
| Chest | 3.4 | Continuously check the chest on the axial view |
| 3.5 | Obtain the sagittal view of the diaphragm and left lung |
| 3.6 | Obtain the sagittal view of the diaphragm and right lung |
| 3.7 | Obtain the coronal view of the diaphragm |
| 3.8 | Check the shape of the chest |
| 3.9 | Check the left lung and right lung |
| 3.10 | Check the diaphragm |
| Abdomen | 3.11 | Obtain abdominal circumference (AC) plane |
| 3.12 | Measure AC |
| 3.13 | Check the stomach bubble |
| 3.14 | Check the liver |
| 3.15 | Check the gall bladder |
| 3.16 | Obtain axial view of kidneys |
| 3.17 | Obtain coronal view of kidneys |
| 3.18 | Obtain sagittal views of kidneys |
| 3.19 | Obtain umbilical cord insertion plane |
| 3.20 | Check the abdominal wall |
| 3.21 | Check the intestinal tract |
| 3.22 | Obtain the axial view of the bladder and umbilical arteries, with CDFI |
| 3.23 | Check the bladder |
| 3.24 | Check the umbilical arteries |
| Task module 4 | Spine | 4.1 | Obtain the midsagittal view of spine |
| 4.2 | Continuously check the spine on axial view |
| 4.3 | Obtain the coronal view of the spine |
| 4.4 | Check the continuity of the spine |
| 4.5 | Check the position of conus medullaris |
| Limbs | 4.6 | Check the left humerus |
| 4.7 | Measure humerus length (HL) |
| 4.8 | Check the left ulna and radius |
| 4.9 | Check the left hand |
| 4.10 | Check the right humerus |
| 4.11 | Check the right ulna and radius |
| 4.12 | Check the right hand |
| 4.13 | Check the left femur |
| 4.14 | Measure femur length (FL) |
| 4.15 | Check the left tibia and fibula |
| 4.16 | Check the left foot |
| 4.17 | Check the right femur |
| 4.18 | Check the right tibia and fibula |
| 4.19 | Check the right foot |
| Placenta，umbilical cord and amniotic fluid | 4.20 | Check the umbilical cord insertion site into the placenta |
| 4.21 | Continuously check the placenta |
| 4.22 | Measure the thickness of the placenta |
| 4.23 | Measure the distance between the placenta and internal uterine cervix orifice |
| 4.24 | Check the umbilical cord placental insertion site and abdominal wall insertion site, check the number of umbilical vessels |
| 4.25 | Measure amniotic fluid index |
| Maternal uterus/adnexa | 4.26 | Obtain the midsagittal plane of the cervix |
| 4.27 | Check the uterine cervix |
| 4.28 | Measure cervical length on the midsagittal plane of the cervix |
| 4.29 | Check the maternal uterus |
| 4.30 | Check the adnexa of the maternal uterus |
| Conclusions | 4.31 | Summarize the examination |
